# Supplementary material
Source: Research Square preprint supplement (doi:10.21203/rs.3.rs-9358745/v1)
Supplement: Supplementary file 1 [file 4a303c6e752c1b98af2235c3.docx]

# Survey Questionnaire: AR-Based Liver Surgery Training Evaluation

## Part 1. Learning Engagement Survey

Instruction: Please rate your level of agreement with the following statements according to your actual learning experience with the AR-based training system.
(1 = Strongly Disagree, 2 = Disagree, 3 = Neutral, 4 = Agree, 5 = Strongly Agree)

| No. | Statement | 1 | 2 | 3 | 4 | 5 |
| --- | --- | --- | --- | --- | --- | --- |
| 1 | I was highly focused during the training session. | ☐ | ☐ | ☐ | ☐ | ☐ |
| 2 | I found this learning method enjoyable. | ☐ | ☐ | ☐ | ☐ | ☐ |
| 3 | I felt motivated to continue learning more. | ☐ | ☐ | ☐ | ☐ | ☐ |
| 4 | This method engaged me more than traditional learning. | ☐ | ☐ | ☐ | ☐ | ☐ |
| 5 | I would recommend this learning method to peers. | ☐ | ☐ | ☐ | ☐ | ☐ |

## Part 2. System Usability Scale (SUS) (Brooke, 1996)

Instruction: Please indicate your level of agreement with each of the following statements about the AR-based training system.
(1 = Strongly Disagree, 2 = Disagree, 3 = Neutral, 4 = Agree, 5 = Strongly Agree)

| No. | Statement | 1 | 2 | 3 | 4 | 5 |
| --- | --- | --- | --- | --- | --- | --- |
| 1 | I think that I would like to use this system frequently. | ☐ | ☐ | ☐ | ☐ | ☐ |
| 2 | I found the system unnecessarily complex. (R) | ☐ | ☐ | ☐ | ☐ | ☐ |
| 3 | I thought the system was easy to use. | ☐ | ☐ | ☐ | ☐ | ☐ |
| 4 | I think that I would need technical support to use this system. (R) | ☐ | ☐ | ☐ | ☐ | ☐ |
| 5 | I found the various functions in this system well integrated. | ☐ | ☐ | ☐ | ☐ | ☐ |
| 6 | I thought there was too much inconsistency in this system. (R) | ☐ | ☐ | ☐ | ☐ | ☐ |
| 7 | I would imagine that most people would learn to use this system very quickly. | ☐ | ☐ | ☐ | ☐ | ☐ |
| 8 | I found the system very cumbersome to use. (R) | ☐ | ☐ | ☐ | ☐ | ☐ |
| 9 | I felt very confident using the system. | ☐ | ☐ | ☐ | ☐ | ☐ |
| 10 | I needed to learn a lot of things before I could get going with this system. (R) | ☐ | ☐ | ☐ | ☐ | ☐ |

### Scoring Method (for reference)

For odd-numbered items: Score = Rating − 1
For even-numbered items: Score = 5 − Rating
Final SUS score = (Sum of all item scores × 2.5), range 0–100
